# Supplementary material
Source: HighWire-hosted journal article supplement (https://bmjopen.bmj.com/content/10/1/e031848)
Supplement: inline-supplementary-material-1 [file inline-supplementary-material-1.pdf]

Supplementary Table 1: Results of analyses comparing health and lifestyle characteristics of sample with national normative data

|                                       | <b>Results of <math>\chi^2</math> comparing smoking, fruit and vegetable intake and obesity norms for the whole sample and by yoga teachers and yoga practitioners</b>     |                                          |                                            |
|---------------------------------------|----------------------------------------------------------------------------------------------------------------------------------------------------------------------------|------------------------------------------|--------------------------------------------|
|                                       | <b>All</b>                                                                                                                                                                 | <b>Yoga teachers</b>                     | <b>Yoga practitioners</b>                  |
| Current Smoker                        | $\chi^2$ (1, N=100) =221.814, $p < .0005$                                                                                                                                  | $\chi^2$ (1, N=28) =99.714, $p < .0005$  | $\chi^2$ (1, N=65) =108.25, $p < .0005$    |
| Daily fruit/vegetable intake $\geq 5$ | $\chi^2$ (1, N=1320) = 1030.898, $p < .0005$                                                                                                                               | $\chi^2$ (1, N=557) = 600.86, $p < .005$ | $\chi^2$ (1, N= 676) = 408.56, $p < .0005$ |
| Obese (BMI $\geq 30$ )                | $\chi^2$ (1, N=114) =510.537, $p < .0005$                                                                                                                                  | $\chi^2$ (1, N=27) = 510.537 $p < .0005$ | $\chi^2$ (1,N=87) = 245.98 $p < .0005$     |
|                                       | <b>Results of one-sample t-tests (two-tailed) comparing BMI and wellbeing scales with available norms for the whole sample and by yoga teachers and yoga practitioners</b> |                                          |                                            |
|                                       | <b>All</b>                                                                                                                                                                 | <b>Yoga teachers</b>                     | <b>Yoga practitioners</b>                  |
| BMI                                   | $t(2345) = -56.495$ , $p < .0005$                                                                                                                                          | $t(872) = -44.251$ , $p < .0005$         | $t(1315) = -36.499$ , $p < .0005$          |
| Wellbeing (WEMWBS)                    | $t(2174) = 16.808$ , $p < .0005$                                                                                                                                           | $t(853) = 21.163$ , $p < .0005$          | $t(1306) = 6.396$ , $p < .0005$            |
| Stress (PSS-4)                        | $t(2168) = -25.209$ , $p < .0005$                                                                                                                                          | $t(848) = -25.161$ , $p < .0005$         | $t(1306) = -13.497$ , $p < .0005$          |
| Satisfaction with life (ONS)          | $t(2188) = 7.453$ , $p < .0005$                                                                                                                                            | $t(858) = 12.899$ , $p < .0005$          | $t(1315) = .399$ , $p = .690$              |
| Life worthwhile (ONS)                 | $t(2185) = 11.344$ , $p < .0005$                                                                                                                                           | $t(857) = 18.791$ , $p < .0005$          | $t(1314) = 1.971$ , $p = .049$             |
| Happiness yesterday (ONS)             | $t(2184) = 12.349$ , $p < .0005$                                                                                                                                           | $t(856) = 14.943$ , $p < .0005$          | $t(1313) = 4.849$ , $p < .0005$            |
| Anxiety yesterday (ONS)               | $t(2189) = 11.157$ , $p = .009$                                                                                                                                            | $t(859) = 3.475$ , $p = .001$            | $t(1315) = 11.675$ , $p < .0005$           |

Supplementary Table 2: Spearman intercorrelations for health impact and yoga practice variables

|                                 | My physical health has improved as a result of yoga | My mental health has improved as a result of yoga | I have changed my lifestyle as a result of yoga | My stress level has improved as a result of yoga | My strength has improved as a result of yoga | My flexibility has improved as a result of yoga | My sleep has improved as a result of yoga |
|---------------------------------|-----------------------------------------------------|---------------------------------------------------|-------------------------------------------------|--------------------------------------------------|----------------------------------------------|-------------------------------------------------|-------------------------------------------|
| Hours at home per week          | .305**                                              | .276**                                            | .411**                                          | .303**                                           | .283**                                       | .226**                                          | .265**                                    |
| Hours in class per week         | .194**                                              | .104**                                            | .165**                                          | .102**                                           | .142**                                       | .158**                                          | .127**                                    |
| Days per week                   | .289**                                              | .272**                                            | .395**                                          | .316**                                           | .279**                                       | .223**                                          | .247**                                    |
| Years of practice               | .130**                                              | .078**                                            | .080**                                          | .086**                                           | .088**                                       | .103**                                          | .072**                                    |
| My physical health has improved |                                                     | .655**                                            | .585**                                          | .598**                                           | .622**                                       | .596**                                          | .467**                                    |
| My mental health has improved   |                                                     |                                                   | .615**                                          | .726**                                           | .539**                                       | .476**                                          | .496**                                    |

|                              |  |  |  |        |        |        |        |
|------------------------------|--|--|--|--------|--------|--------|--------|
| I have changed my lifestyle  |  |  |  | .682** | .547** | .480** | .510** |
| My stress level has improved |  |  |  |        | .568** | .505** | .541** |
| My strength has improved     |  |  |  |        |        | .678** | .469** |
| My flexibility has improved  |  |  |  |        |        |        | .447** |

Statistical significance: \*p< 0.01 level (2-tailed), \*\*p<0.005 level (2-tailed).
